# Supplementary material
Source: publisher figshare collection journal article supplement (https://acs.figshare.com/ndownloader/files/15291836)
Supplement: Supplementary file 1 [file 15291836]

# Supporting Information for

## Photoelectron-Photofragment Coincidence Studies of the Dissociation Dynamics of the OH-CH<sub>4</sub> Complex

Yanice Benitez,<sup>1</sup> Dandan Lu,<sup>2</sup> Katharine G. Lunney,<sup>1</sup> Jun Li,<sup>2,3,\*</sup> Hua Guo,<sup>4</sup> and Robert E. Continetti<sup>1,\*</sup>

<sup>1</sup>Department of Chemistry and Biochemistry, University of California, San Diego,  
9500 Gilman Drive, La Jolla, CA 92093, USA

<sup>2</sup>School of Chemistry and Chemical Engineering, Chongqing University, Chongqing  
401331, China

<sup>3</sup>Institut für Physikalische Chemie, Georg-August-Universität Göttingen, Göttingen  
37077, Germany

<sup>4</sup>Department of Chemistry and Chemical Biology, University of New Mexico,  
Albuquerque, NM 87131, USA

\*: corresponding authors, emails: [jli15@cqu.edu.cn](mailto:jli15@cqu.edu.cn), [rcontinetti@ucsd.edu](mailto:rcontinetti@ucsd.edu)

### Contents

**Figure S1.** Schematic of source section comprising of the dual pulsed valve entrainment source, Wiley extraction plates, ion optics, COAT, and acceleration stack.

**Figure S2.** The geometries (distances in angstrom and angle in degree) and harmonic frequencies (cm<sup>-1</sup>) of the optimized OH<sup>-</sup>(CH<sub>4</sub>) anion. The first entry is obtained on the PIP-NN anion PES, and the second is determined at the level of CCSD(T)-F12a/AVTZ.

**Figure S3.** The fitting errors as a function of the ab initio energy (eV) for the anion PES with zero at the anion equilibrium.

**Figure S4.** The vibrational and rotational energy populations of the OH and CH<sub>4</sub>

species.

**Figure S5.** Photoelectron-photofragment coincidence plot for  $\text{OH}^-(\text{CD}_4)$ . The  $\text{KE}_{\text{max}}$  for  $\text{OH} + \text{CD}_4$  channel is labeled with a theoretical isotope shift of -0.0055 eV relative to the  $\text{OH}^-(\text{CH}_4)$   $\text{KE}_{\text{max}}$  for  $\text{OH} + \text{CH}_4$ .

**Figure S6.** Photoelectron-photofragment coincidence plot for  $\text{OD}^-(\text{CD}_4)$ . The  $\text{KE}_{\text{max}}$  for  $\text{OD} + \text{CD}_4$  channel is labeled with a theoretical isotope shift of -0.0080 eV relative to the  $\text{OH}^-(\text{CH}_4)$   $\text{KE}_{\text{max}}$  for  $\text{OH} + \text{CH}_4$ .

**Table S1.** Dominant peak centers and their respective FWHMs for stable, dissociative, and total (stable + dissociative) photoelectrons.

**Figure S1.** Schematic of the source section comprising of the dual pulsed valve entrainment source, Wiley extraction plates, ion optics, COAT, and acceleration stack.

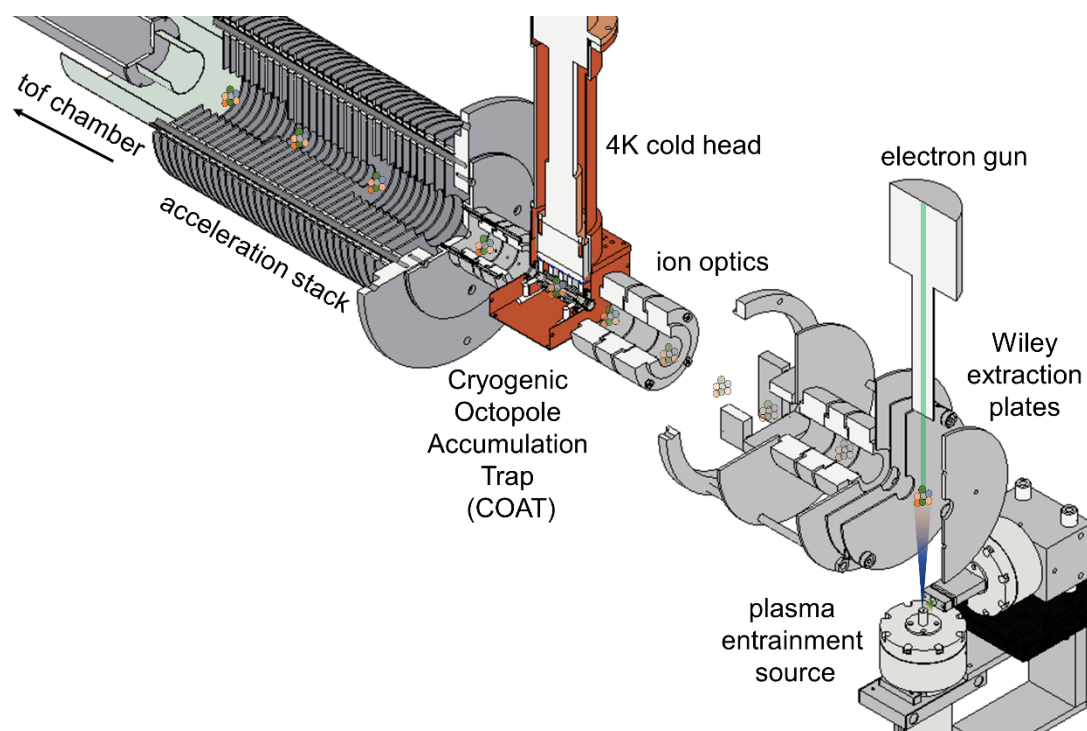

**Figure S2.** The geometries (distances in angstroms and angles in degrees) and harmonic frequencies ( $\text{cm}^{-1}$ ) of the optimized  $\text{OH}^-(\text{CH}_4)$  anion. The first entry is obtained on the PIP-NN anion PES, and the second is determined at the level of CCSD(T)-F12a/AVTZ.

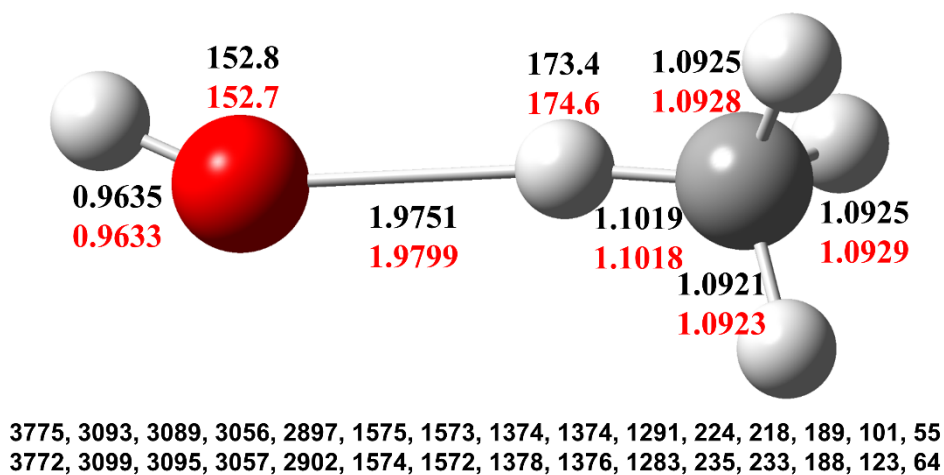

**Figure S3.** The fitting errors as a function of the ab initio energy (eV) for the anion PES with zero at the anion equilibrium.

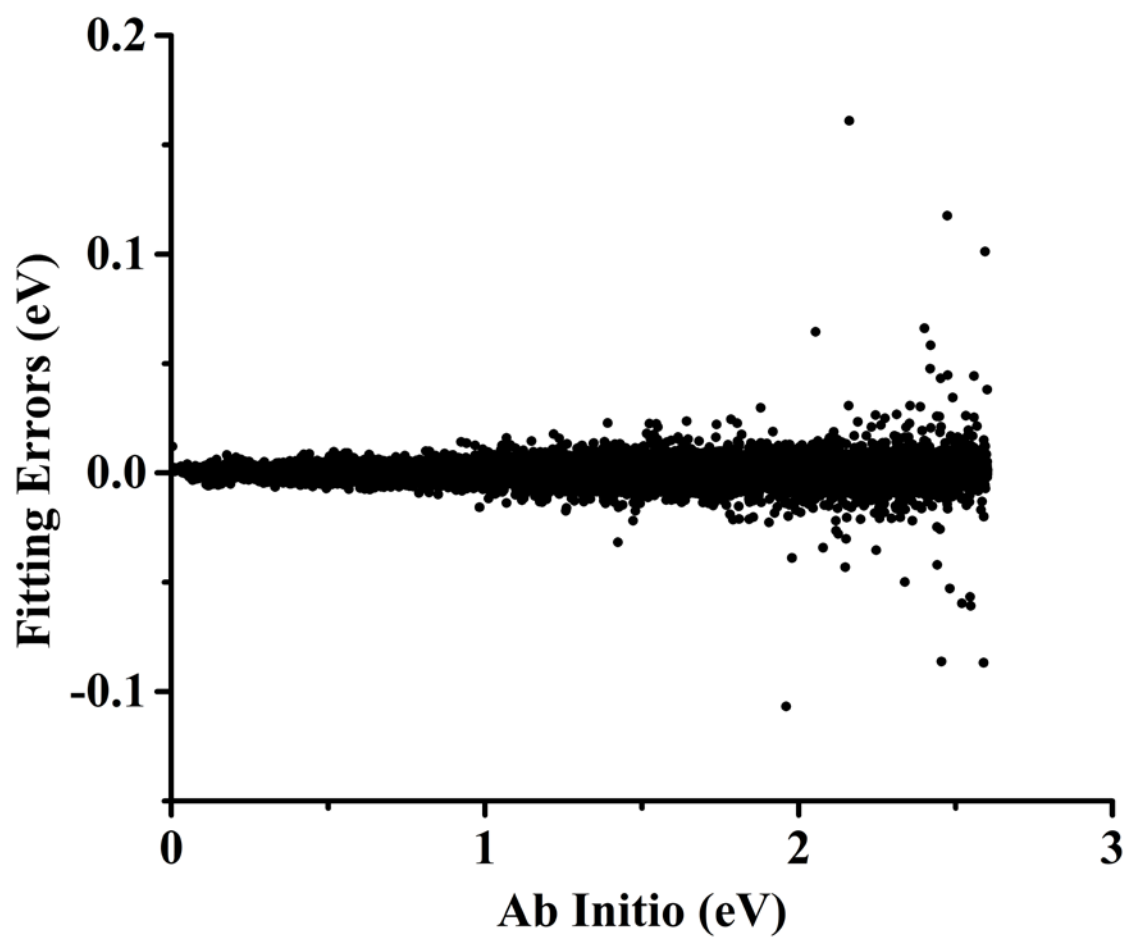

**Figure S4.** The vibrational and rotational energy populations of the OH and CH<sub>4</sub> species.

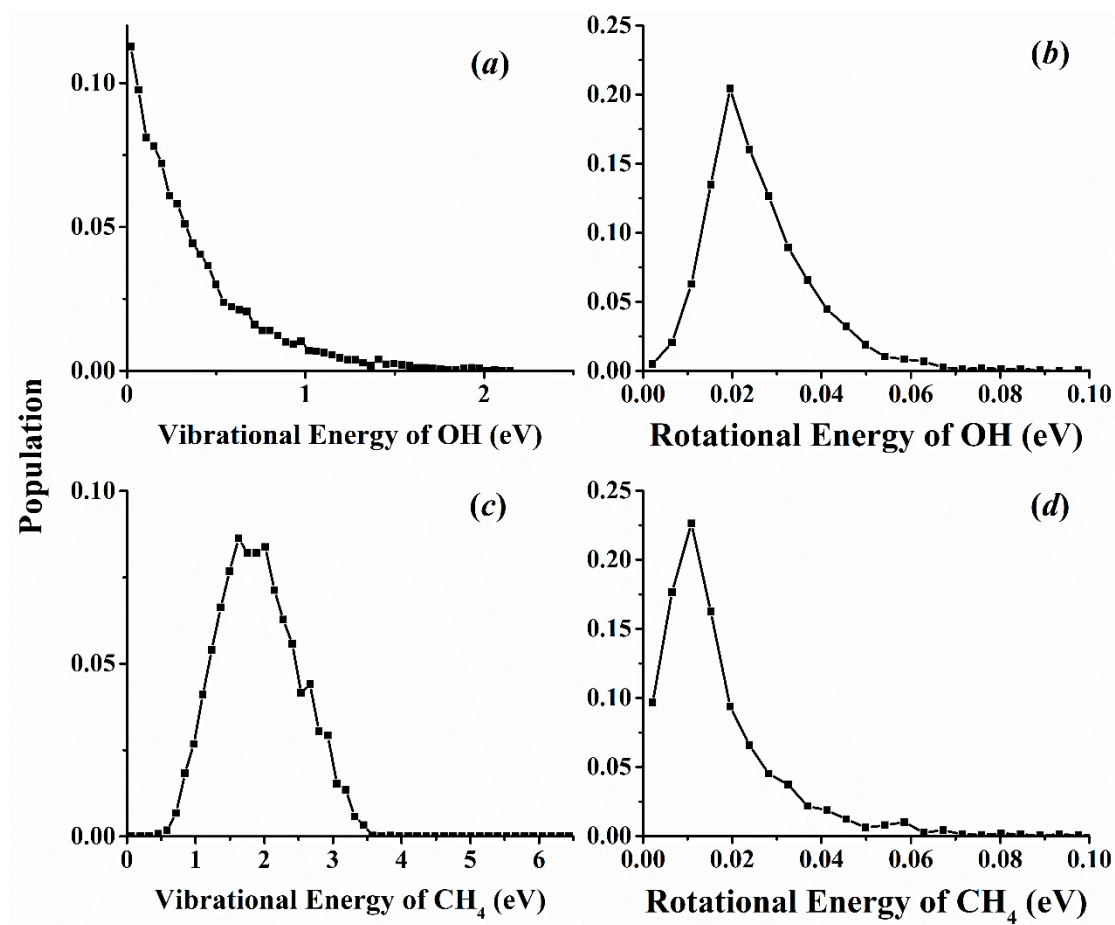

**Figure S5.** Photoelectron-photofragment coincidence plot for  $\text{OH}^-(\text{CD}_4)$ . The  $\text{KE}_{\text{max}}$  for  $\text{OH} + \text{CD}_4$  channel is labeled with a theoretical isotope shift of  $-0.0055 \text{ eV}$  relative to the  $\text{OH}^-(\text{CH}_4)$   $\text{KE}_{\text{max}}$  for  $\text{OH} + \text{CH}_4$ .

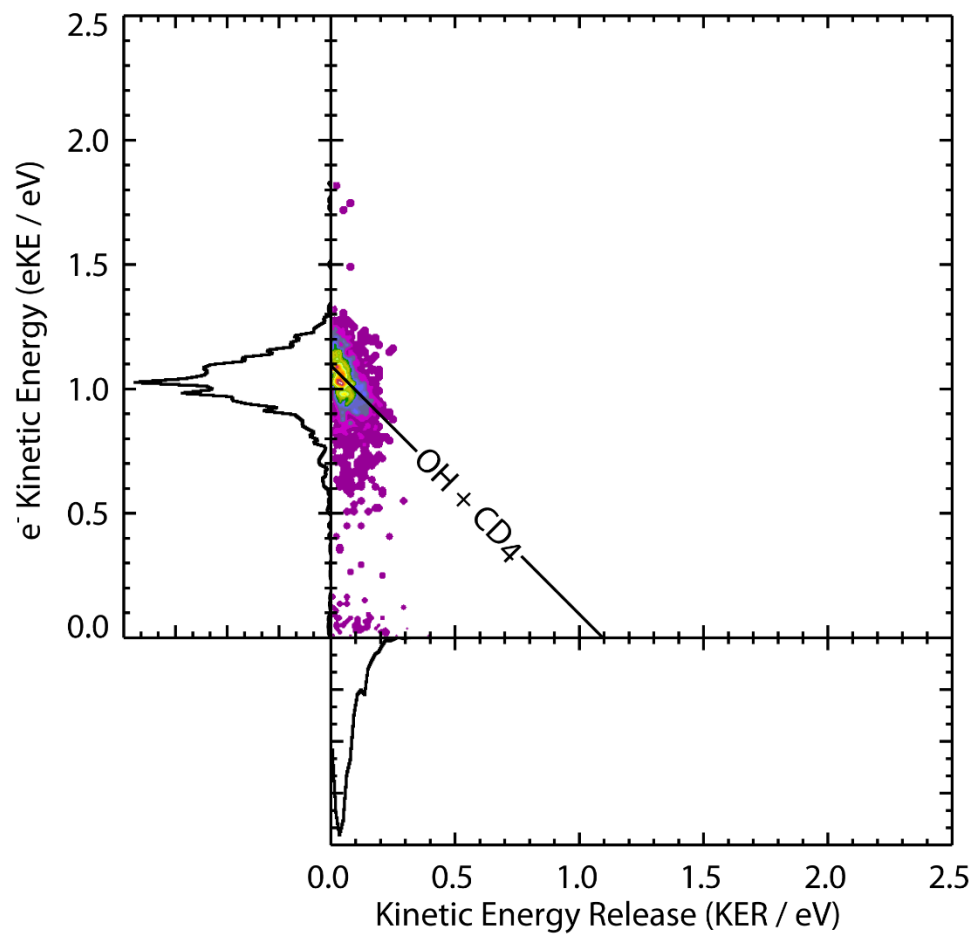

**Figure S6.** Photoelectron-photofragment coincidence plot for  $\text{OD}^-(\text{CD}_4)$ . The  $\text{KE}_{\text{max}}$  for  $\text{OD} + \text{CD}_4$  channel is labeled with a theoretical isotope shift of  $-0.0080 \text{ eV}$  relative to the  $\text{OH}^-(\text{CH}_4)$   $\text{KE}_{\text{max}}$  for  $\text{OH} + \text{CH}_4$ .

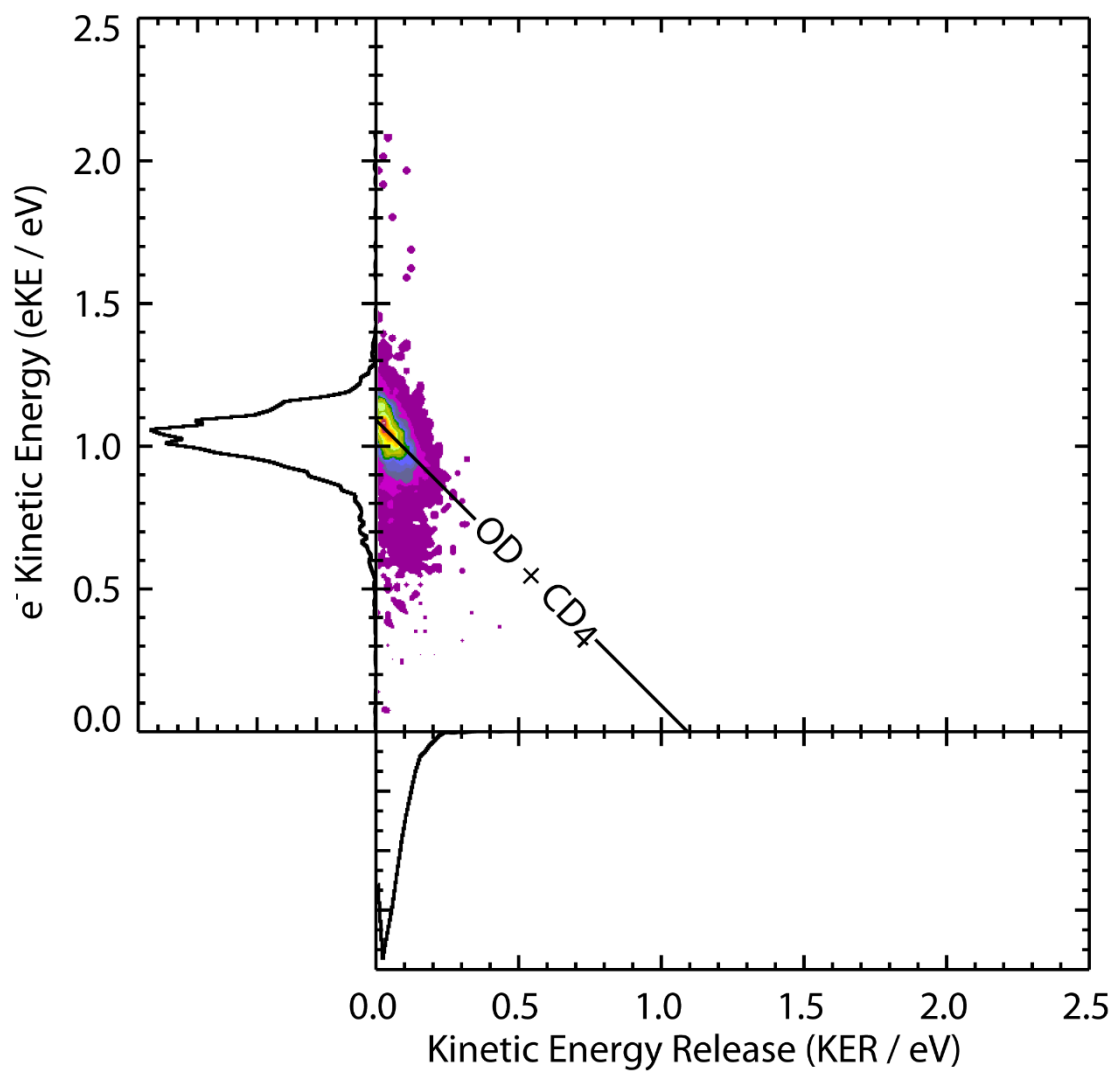



**Table S1.** Dominant peak centers and their respective FWHMs for stable, dissociative, and total (stable + dissociative) photoelectrons.

| Species              | eKE centers (eV)  | FWHM (eV) |
|----------------------|-------------------|-----------|
| OH(CH <sub>4</sub> ) | 1.09 <sup>a</sup> | 0.16      |
|                      | 1.03 <sup>b</sup> | 0.21      |
|                      | 1.06 <sup>c</sup> | -         |
| OH(CD <sub>4</sub> ) | 1.10 <sup>a</sup> | 0.19      |
|                      | 1.03 <sup>b</sup> | 0.21      |
|                      | 1.06 <sup>c</sup> | -         |
| OD(CD <sub>4</sub> ) | 1.10 <sup>a</sup> | 0.20      |
|                      | 1.04 <sup>b</sup> | 0.20      |
|                      | 1.05 <sup>c</sup> | -         |

<sup>a</sup>Value for stable photoelectrons

<sup>b</sup>Value for dissociative photoelectrons

<sup>c</sup>Value for total (stable + dissociative) photoelectrons
